# Supplementary material for: Luminal progenitor and fetal mammary stem cell expression features predict breast tumor response to neoadjuvant chemotherapy
Source: Springer Nature journal article supplement (doi:10.1007/s10549-014-3262-6), 2015-01-01
Supplement: MOESM4 [file 8846884]

# Supplemental Table 2

| <b>Characteristic</b>  | <b>Total</b> |
|------------------------|--------------|
| <b>Age</b>             |              |
| < 50                   | 361 (51.4%)  |
| ≥ 50                   | 341 (48.6%)  |
| Mean years (SD)        | 49.7 (10.5)  |
| <b>ER</b>              |              |
| negative               | 311 (44.3%)  |
| positive               | 391 (55.7%)  |
| <b>PR</b>              |              |
| negative               | 386 (55.0%)  |
| positive               | 316 (45.0%)  |
| <b>HER2</b>            |              |
| negative               | 654 (93.2%)  |
| positive               | 48 (6.8%)    |
| <b>Triple Negative</b> |              |
| no                     | 445 (63.4%)  |
| yes                    | 257 (36.6%)  |
| <b>Tumor Stage</b>     |              |
| 1                      | 33 (4.7%)    |
| 2                      | 401 (57.1%)  |
| 3                      | 189 (26.9%)  |
| 4                      | 79 (11.3%)   |
| <b>pCR</b>             |              |
| no                     | 547 (77.9%)  |
| yes                    | 155 (22.1%)  |
| <b>PAM50 Subtype</b>   |              |
| Basal-like             | 233 (33.2%)  |
| HER2-Enriched          | 67 (9.5%)    |
| Luminal A              | 208 (29.6%)  |
| Luminal B              | 141 (20.1%)  |
| Normal-like            | 53 (7.5%)    |
