# Supplementary material for: Luminal progenitor and fetal mammary stem cell expression features predict breast tumor response to neoadjuvant chemotherapy
Source: Springer Nature journal article supplement (doi:10.1007/s10549-014-3262-6), 2015-01-01
Supplement: MOESM5 [file 8846884]

# Supplemental Table 3

|                                | Patients                           | UVA<br>p-value                     | UVA<br>Odds Ratio | UVA<br>AUC       |                  |
|--------------------------------|------------------------------------|------------------------------------|-------------------|------------------|------------------|
| Human FACS Signatures          | <b>aStr-HsEnriched</b>             | 702 (100%)                         | 0.226             | 0.89 (0.74-1.07) | 0.536            |
|                                | aStr-HsEnriched-feature1           | 702 (100%)                         | 0.863             | 0.98 (0.82-1.18) | 0.510            |
|                                | aStr-HsEnriched-feature2           | 702 (100%)                         | 0.083             | 0.85 (0.70-1.02) | 0.550            |
|                                | <b>aMaSC-HsEnriched</b>            | 702 (100%)                         | 0.703             | 1.04 (0.87-1.24) | 0.510            |
|                                | aMaSC-HsEnriched-feature1          | 702 (100%)                         | 0.547             | 0.95 (0.79-1.13) | 0.518            |
|                                | <b>LumProg-HsEnriched</b>          | 702 (100%)                         | <0.001            | 2.12 (1.76-2.58) | 0.707            |
|                                | LumProg-HsEnriched-feature1        | 702 (100%)                         | <0.001            | 1.85 (1.53-2.24) | 0.669            |
|                                | <b>MatureLum-HsEnriched</b>        | 702 (100%)                         | <0.001            | 0.47 (0.38-0.57) | 0.704            |
|                                | MatureLum-HsEnriched-feature1      | 702 (100%)                         | <0.001            | 0.46 (0.37-0.55) | 0.713            |
|                                | Mouse FACS Signatures              | <b>Str-MmEnriched</b>              | 702 (100%)        | 0.011            | 0.78 (0.64-0.94) |
| Str-MmEnriched-feature1        |                                    | 702 (100%)                         | 0.209             | 0.89 (0.73-1.06) | 0.545            |
| Str-MmEnriched-feature2        |                                    | 702 (100%)                         | 0.029             | 0.81 (0.67-0.98) | 0.556            |
| Str-MmEnriched-feature3        |                                    | 702 (100%)                         | <0.001            | 0.57 (0.47-0.70) | 0.652            |
| Str-MmEnriched-feature4        |                                    | 702 (100%)                         | 0.008             | 0.78 (0.65-0.94) | 0.574            |
| <b>fMaSC-MmEnriched</b>        |                                    | 702 (100%)                         | 0.009             | 1.27 (1.06-1.51) | 0.561            |
| fMaSC-MmEnriched-feature1      |                                    | 702 (100%)                         | <0.001            | 1.89 (1.58-2.28) | 0.678            |
| fMaSC-MmEnriched-feature2      |                                    | 702 (100%)                         | <0.001            | 0.48 (0.39-0.58) | 0.704            |
| <b>aMaSC-MmEnriched</b>        |                                    | 702 (100%)                         | 0.843             | 1.02 (0.85-1.22) | 0.506            |
| aMaSC-MmEnriched-feature1      |                                    | 702 (100%)                         | 0.003             | 1.30 (1.09-1.55) | 0.569            |
| aMaSC-MmEnriched-feature2      |                                    | 702 (100%)                         | 0.491             | 1.06 (0.89-1.27) | 0.530            |
| aMaSC-MmEnriched-feature3      |                                    | 702 (100%)                         | 0.023             | 0.81 (0.67-0.97) | 0.550            |
| <b>LumProg-MmEnriched</b>      |                                    | 702 (100%)                         | 0.733             | 1.03 (0.86-1.23) | 0.498            |
| LumProg-MmEnriched-feature1    |                                    | 702 (100%)                         | 0.488             | 1.07 (0.89-1.27) | 0.527            |
| LumProg-MmEnriched-feature2    |                                    | 702 (100%)                         | <0.001            | 0.56 (0.46-0.68) | 0.664            |
| <b>MatureLum-MmEnriched</b>    |                                    | 702 (100%)                         | 0.004             | 0.77 (0.64-0.92) | 0.583            |
| MatureLum-MmEnriched-feature1  |                                    | 702 (100%)                         | <0.001            | 1.71 (1.42-2.07) | 0.653            |
| MatureLum-MmEnriched-feature2  |                                    | 702 (100%)                         | <0.001            | 2.30 (1.89-2.81) | 0.729            |
| MatureLum-MmEnriched-feature3  |                                    | 702 (100%)                         | 0.020             | 1.25 (1.04-1.50) | 0.566            |
| MatureLum-MmEnriched-feature4  |                                    | 702 (100%)                         | 0.059             | 0.84 (0.69-1.00) | 0.542            |
| MatureLum-MmEnriched-feature5  |                                    | 702 (100%)                         | 0.164             | 0.88 (0.74-1.05) | 0.548            |
| MatureLum-MmEnriched-feature6  |                                    | 702 (100%)                         | 0.618             | 1.05 (0.88-1.25) | 0.507            |
| MatureLum-MmEnriched-feature7  |                                    | 702 (100%)                         | 0.001             | 1.35 (1.13-1.63) | 0.578            |
| MatureLum-MmEnriched-feature8  |                                    | 702 (100%)                         | <0.001            | 0.49 (0.40-0.60) | 0.691            |
| MatureLum-MmEnriched-feature9  |                                    | 702 (100%)                         | 0.291             | 1.10 (0.92-1.33) | 0.522            |
| MatureLum-MmEnriched-feature10 |                                    | 702 (100%)                         | 0.689             | 1.04 (0.87-1.24) | 0.520            |
| Published Signatures           |                                    | <b>Usary et al (PMID:23780888)</b> |                   |                  |                  |
|                                | Usary Untreated Hum                | 702 (100%)                         | <0.001            | 2.46 (1.99-3.09) | 0.728            |
|                                | Usary Resp Hum                     | 702 (100%)                         | 0.005             | 0.76 (0.63-0.92) | 0.585            |
|                                | <b>Hatzi et al (PMID:21558518)</b> |                                    |                   |                  |                  |
|                                | Chemosensitive                     |                                    |                   |                  |                  |
|                                | Insensitive                        | 315 (44.9%)                        |                   | 1                |                  |
|                                | Sensitive                          | 151 (21.5%)                        | <0.001            | 2.58 (1.62-4.10) | 0.610            |
|                                | Not available                      | 236 (33.6%)                        |                   |                  |                  |
|                                | Chemoresistance                    |                                    |                   |                  |                  |
|                                | RCB_0_I                            | 211 (30.1%)                        |                   | 1                |                  |
|                                | RCB_II_III                         | 255 (36.3%)                        | <0.001            | 0.10 (0.06-0.18) | 0.743            |
|                                | Not available                      | 236 (33.6%)                        |                   |                  |                  |
|                                | SET Index                          |                                    |                   |                  |                  |
|                                | Low                                | 411 (58.5%)                        |                   | 1                |                  |
|                                | Int                                | 36 (5.1%)                          | 0.070             | 0.33 (0.08-0.94) |                  |
| High                           | 19 (2.7%)                          | 0.259                              | 0.43 (0.07-1.52)  | 0.541            |                  |
| Not available                  | 236 (33.6%)                        |                                    |                   |                  |                  |
