# Supplementary material for: Luminal progenitor and fetal mammary stem cell expression features predict breast tumor response to neoadjuvant chemotherapy
Source: Springer Nature journal article supplement (doi:10.1007/s10549-014-3262-6), 2015-01-01
Supplement: MOESM6 [file 8846884]

# Supplemental Table 4

|                                       | Patients                                  | MVA<br>p-value                     | MVA<br>Odds Ratio | MVA<br>AUC       |       |
|---------------------------------------|-------------------------------------------|------------------------------------|-------------------|------------------|-------|
| Human<br>Signatures                   | <b>Clinical* + LumProg-HsEnriched</b>     | 702 (100%)                         | 0.014             | 1.50 (1.09-2.09) | 0.778 |
|                                       | Clinical* + LumProg-HsEnriched-feature1   | 702 (100%)                         | 0.030             | 1.39 (1.04-1.88) | 0.777 |
|                                       | <b>Clinical* + MatureLum-HsEnriched</b>   | 702 (100%)                         | 0.433             | 0.84 (0.54-1.30) | 0.772 |
|                                       | Clinical* + MatureLum-HsEnriched-feature1 | 702 (100%)                         | 0.523             | 0.86 (0.53-1.38) | 0.772 |
|                                       | <b>Clinical* + Str-MmEnriched</b>         | 702 (100%)                         | 0.889             | 1.02 (0.79-1.31) | 0.772 |
|                                       | Clinical* + Str-MmEnriched-feature2       | 702 (100%)                         | 0.198             | 0.86 (0.69-1.08) | 0.773 |
|                                       | Clinical* + Str-MmEnriched-feature3       | 702 (100%)                         | 0.048             | 0.79 (0.62-1.00) | 0.776 |
|                                       | Clinical* + Str-MmEnriched-feature4       | 702 (100%)                         | 0.389             | 0.91 (0.72-1.13) | 0.771 |
|                                       | <b>Clinical* + fMaSC-MmEnriched</b>       | 702 (100%)                         | 0.216             | 1.14 (0.93-1.39) | 0.773 |
|                                       | Clinical* + fMaSC-MmEnriched-feature1     | 702 (100%)                         | 0.013             | 1.48 (1.09-2.03) | 0.777 |
| Clinical* + fMaSC-MmEnriched-feature2 | 702 (100%)                                | 0.031                              | 0.71 (0.52-0.97)  | 0.777            |       |
| Mouse<br>Signatures                   | <b>aMaSC-MmEnriched</b>                   |                                    |                   |                  |       |
|                                       | Clinical* + aMaSC-MmEnriched-feature1     | 702 (100%)                         | 0.749             | 1.04 (0.82-1.32) | 0.772 |
|                                       | Clinical* + aMaSC-MmEnriched-feature3     | 702 (100%)                         | 0.018             | 0.77 (0.61-0.95) | 0.775 |
|                                       | <b>LumProg-MmEnriched</b>                 |                                    |                   |                  |       |
|                                       | Clinical* + LumProg-MmEnriched-feature2   | 702 (100%)                         | 0.805             | 0.96 (0.70-1.33) | 0.772 |
|                                       | <b>MatureLum-MmEnriched</b>               |                                    |                   |                  |       |
|                                       | Clinical* + MatureLum-MmEnriched-feature1 | 702 (100%)                         | 0.697             | 0.95 (0.73-1.24) | 0.772 |
|                                       | Clinical* + MatureLum-MmEnriched-feature2 | 702 (100%)                         | 0.671             | 1.06 (0.82-1.37) | 0.772 |
|                                       | Clinical* + MatureLum-MmEnriched-feature3 | 702 (100%)                         | 0.128             | 1.38 (0.91-2.11) | 0.773 |
|                                       | Clinical* + MatureLum-MmEnriched-feature4 | 702 (100%)                         | 0.461             | 1.09 (0.87-1.37) | 0.772 |
|                                       | Clinical* + MatureLum-MmEnriched-feature7 | 702 (100%)                         | 0.577             | 1.07 (0.85-1.34) | 0.772 |
|                                       | Clinical* + MatureLum-MmEnriched-feature8 | 702 (100%)                         | 0.388             | 0.85 (0.58-1.24) | 0.772 |
|                                       | Published<br>Signatures                   | <b>Usary et al (PMID:23780888)</b> |                   |                  |       |
| Clinical* + Usary Untreated Hum       |                                           | 702 (100%)                         | 0.001             | 1.90 (1.29-2.83) | 0.777 |
| Clinical* + Usary Resp Hum            |                                           | 702 (100%)                         | 0.021             | 1.35 (1.05-1.74) | 0.774 |
| <b>Hatzi et al (PMID:21558518)</b>    |                                           |                                    |                   |                  |       |
| Clinical* + Chemosensitive            |                                           |                                    |                   |                  |       |
| Insensitive                           |                                           | 315 (44.9%)                        |                   | 1                | 0.817 |
| Sensitive                             |                                           | 151 (21.5%)                        | <0.001            | 4.38 (2.50-7.84) |       |
| Not available                         |                                           | 236 (33.6%)                        |                   |                  |       |
| Clinical* + Chemoresistance           |                                           |                                    |                   |                  |       |
| RCB_0_I                               |                                           | 211 (30.1%)                        |                   | 1                | 0.860 |
| RCB_II_III                            | 255 (36.3%)                               | <0.001                             | 0.11 (0.06-0.21)  |                  |       |
| Not available                         | 236 (33.6%)                               |                                    |                   |                  |       |

\*Clinical variables consist of Age, ER, PR, HER2, Tumor Stage, PAM50 Subtype, and PAM50 Proliferation Score
