# Supplementary figures and images for: Luminal progenitor and fetal mammary stem cell expression features predict breast tumor response to neoadjuvant chemotherapy
Source: Springer Nature journal article supplement (doi:10.1007/s10549-014-3262-6), 2015-01-01

# Supplemental Figure 1

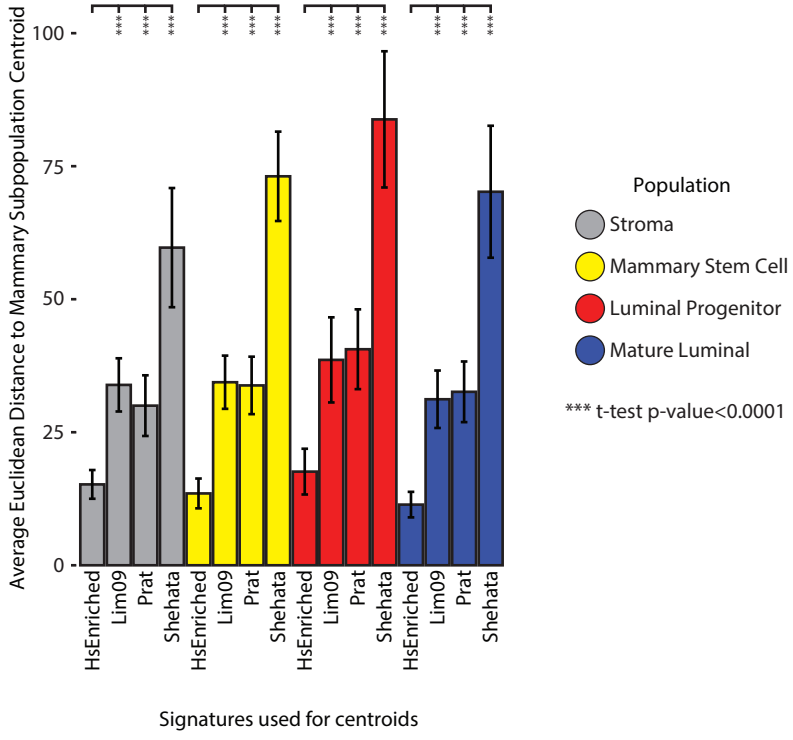

Supplement: MOESM1 [file 8846884]
